# Supplementary material for: Plasma Cell Fate Is Orchestrated by Elaborate Changes in Genome Compartmentalization and Inter-chromosomal Hubs
Source: PubMed Central journal article supplement — Cell Rep. Author manuscript; Available in PMC 2024 Feb 16. (PMC10871151; doi:10.1016/j.celrep.2020.03.034), 2020-04-07
Supplement: NIHMS1958714-supplement-Bortnick_et_al_.pdf [file NIHMS1958714-supplement-Bortnick_et_al_.pdf]

**Cell Reports, Volume 31**

**Supplemental Information**

**Plasma Cell Fate Is Orchestrated**

**by Elaborate Changes in Genome**

**Compartmentalization and Inter-chromosomal Hubs**

**Alexandra Bortnick, Zhaoren He, Megan Aubrey, Vivek Chandra, Matthew Denholtz, Kenian Chen, Yin C. Lin, and Cornelis Murre**

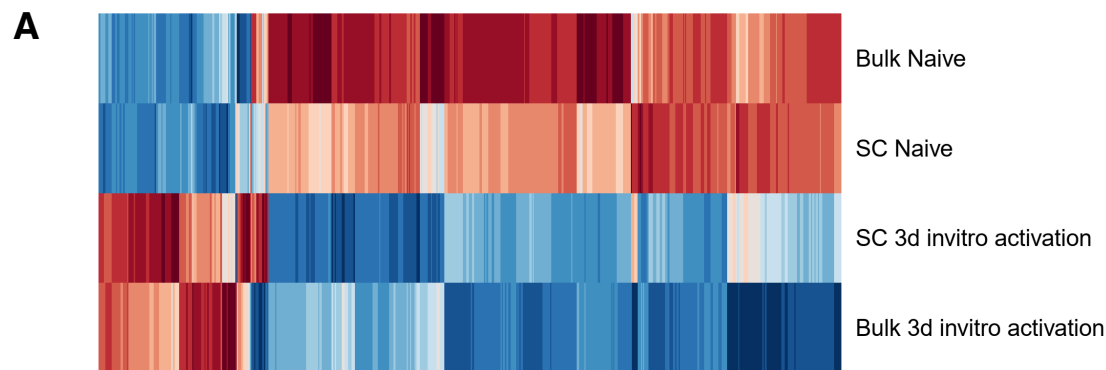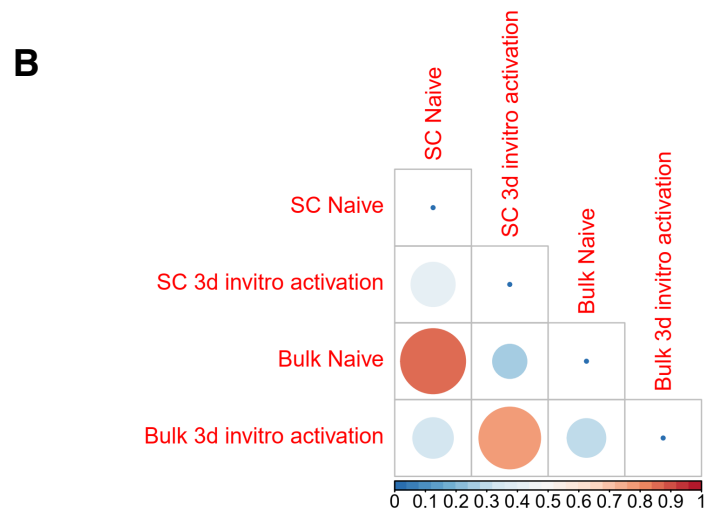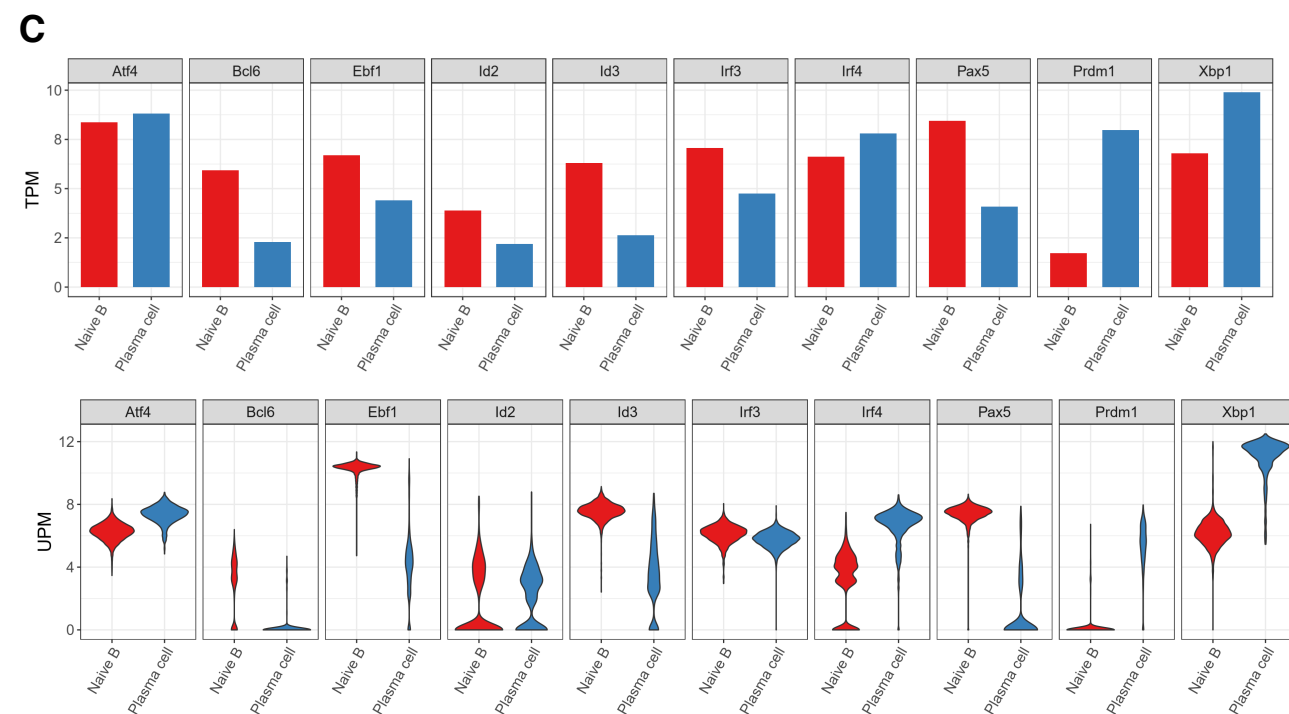

**Figure S1. Single Cell RNA-seq Read Density Closely Correlates with Bulk RNA-seq Read Density. (Related to Figure 1).** (A) Heatmap of genes expression for each sample. Single cells were merged. Each column is a gene. Gene expression is measured as Z-normalized UPM. (B) Spearman correlation between bulk RNA-seq and pseudo-bulk RNA-seq generated by merging scRNA-seq reads. (C) Top panel: Bar-plot of bulk RNA-seq for *Atf4*, *Bcl6*, *Ebf1*, *Id2*, *id*, *Irf3*, *Irf4*, *Pax5*, *Prdm1* and *Xbp1*. Bottom panel: Violin plot of single cell RNA-seq *Atf4*, *Bcl6*, *Ebf1*, *Id2*, *id*, *Irf3*, *Irf4*, *Pax5*, *Prdm1* and *Xbp1*.

**A**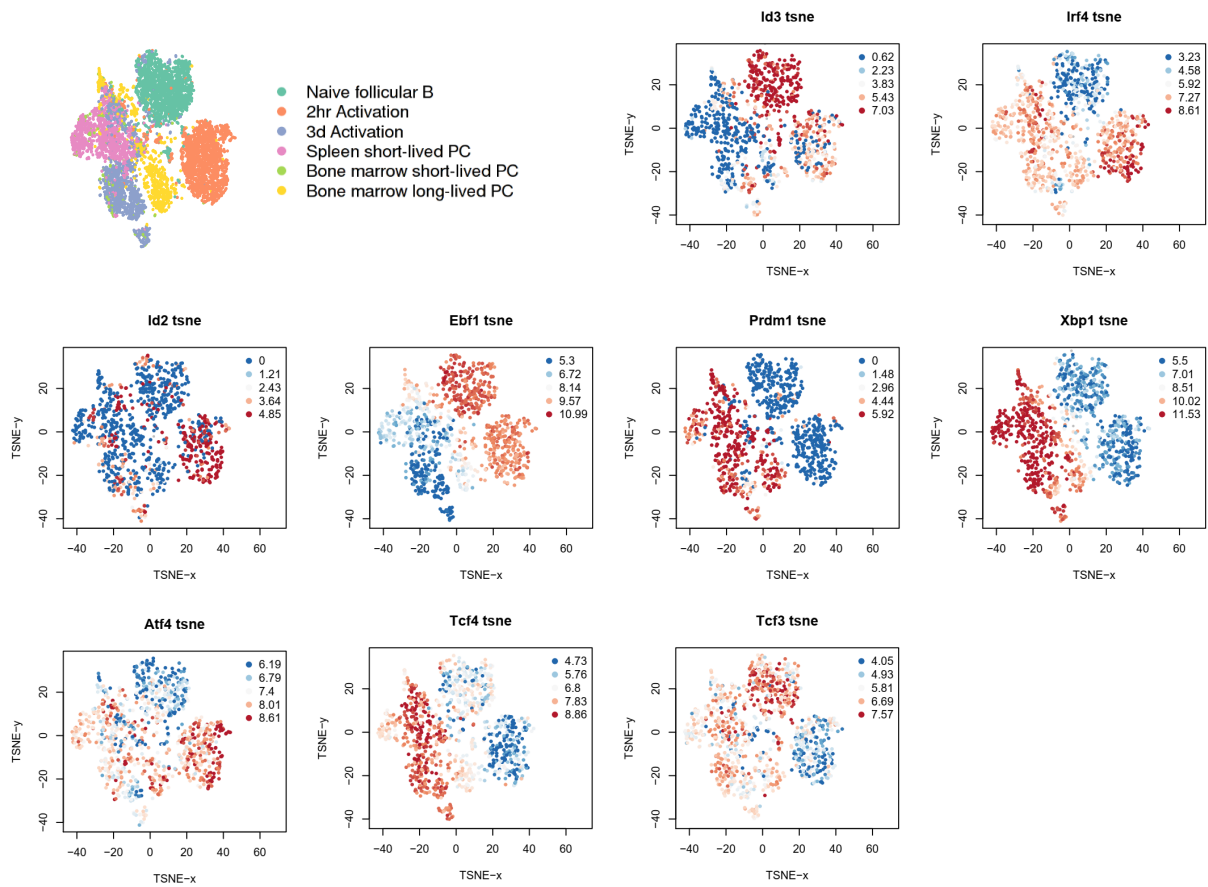**B**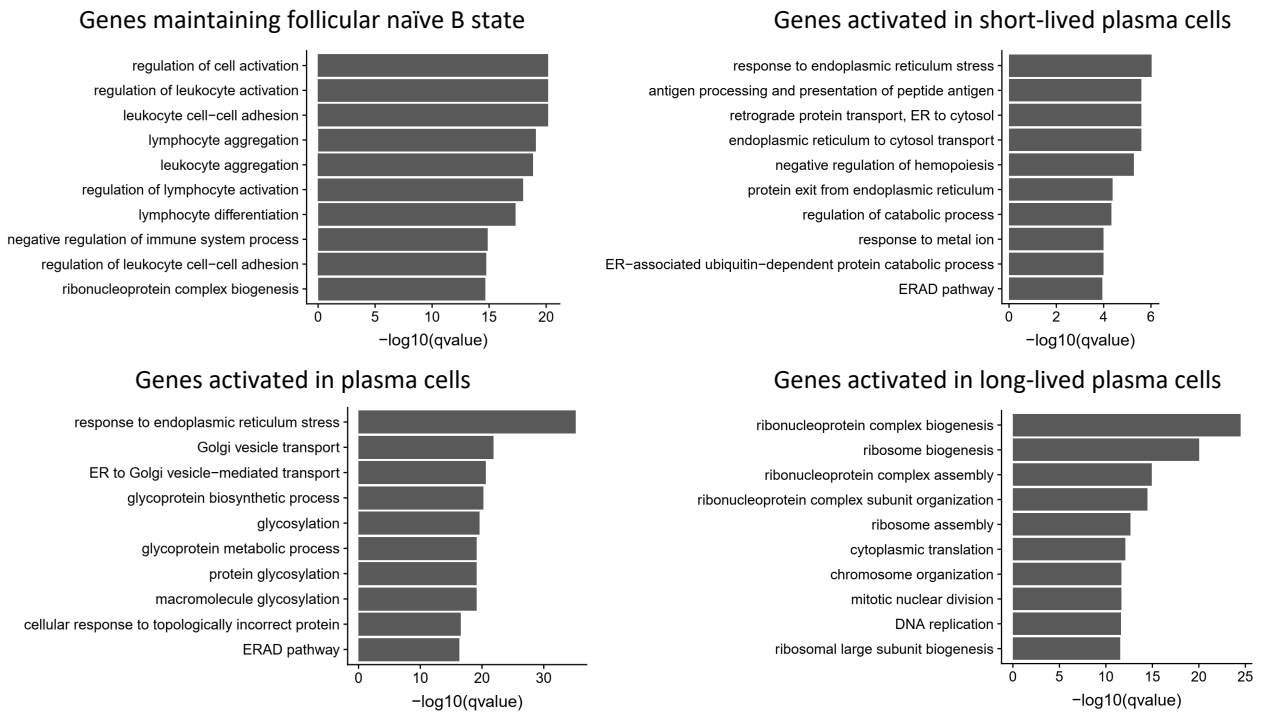

**Figure S2. Gene Expression Patterns and GO Analysis for Differentially Expressed Genes. Related Figure 1.** (A) TSNE plot of single cell RNA-seq. Each dot is a single cell. The first TSNE plot is labeled to show the origin of each cell. Color in the rest of the plots indicates the expression level of corresponding gene. Expression level unit is UPM. (B) GO term bar-plot for DE gene between naïve B cells and 3d in-vitro activated plasma cells (left). GO term bar-plot for DE gene between bone marrow B220<sup>-</sup> plasma cell and bone marrow B220<sup>+</sup> plasma cell (right).

A

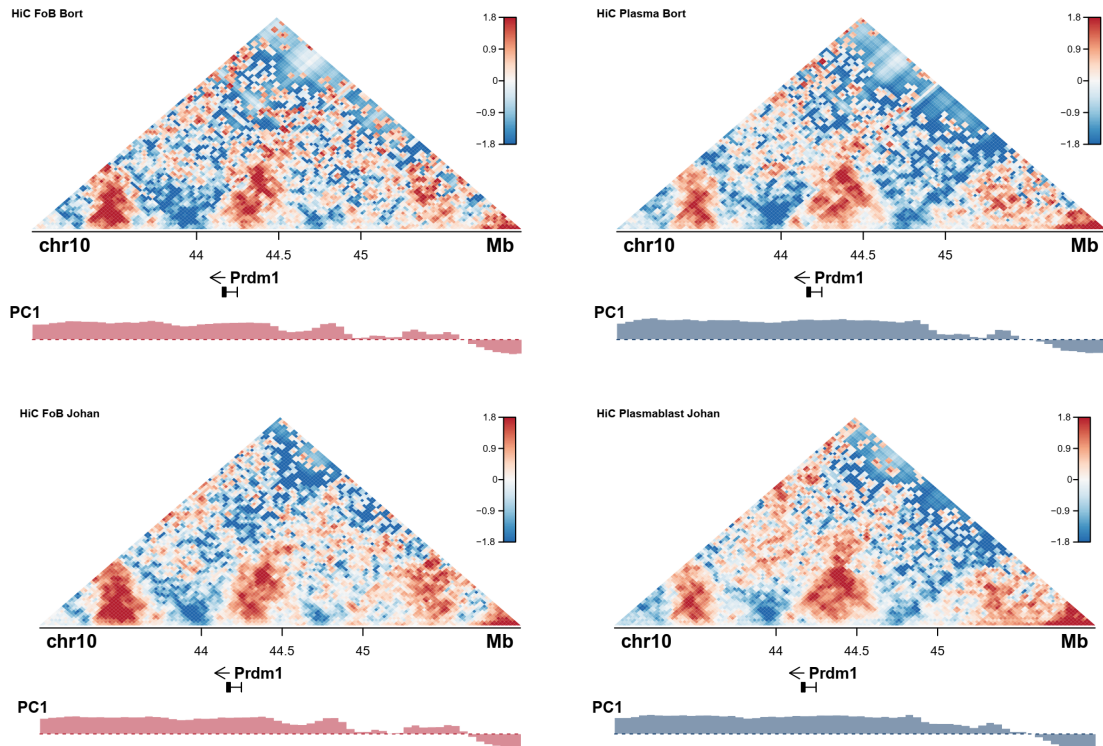

B

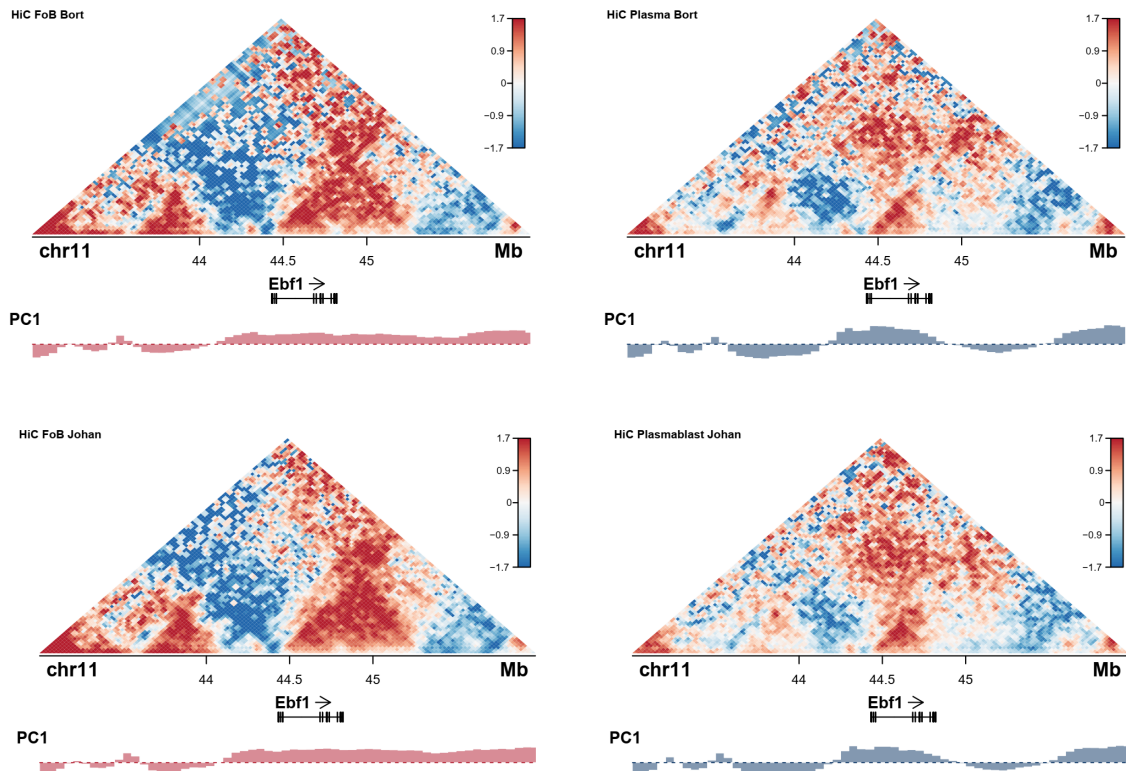

**Figure S3. Plasma Cell Fate is Associated with Large-Scale Changes in Chromatin Folding Across the *Prdm1* and *Ebf1* Loci. Related to Figure 3. (A)** Contact map for chromosome 10 across the *Prdm1* locus at 50 kb resolution for follicular B and plasma cells derived from TCC data (top panels) or derived from HiC data (bottom panels). **(B)** Contact map for chromosome 11 across the *Ebf1* locus at 50 kb resolution for plasma cells from TCC data (top panels) or derived from HiC data (bottom panels).

A

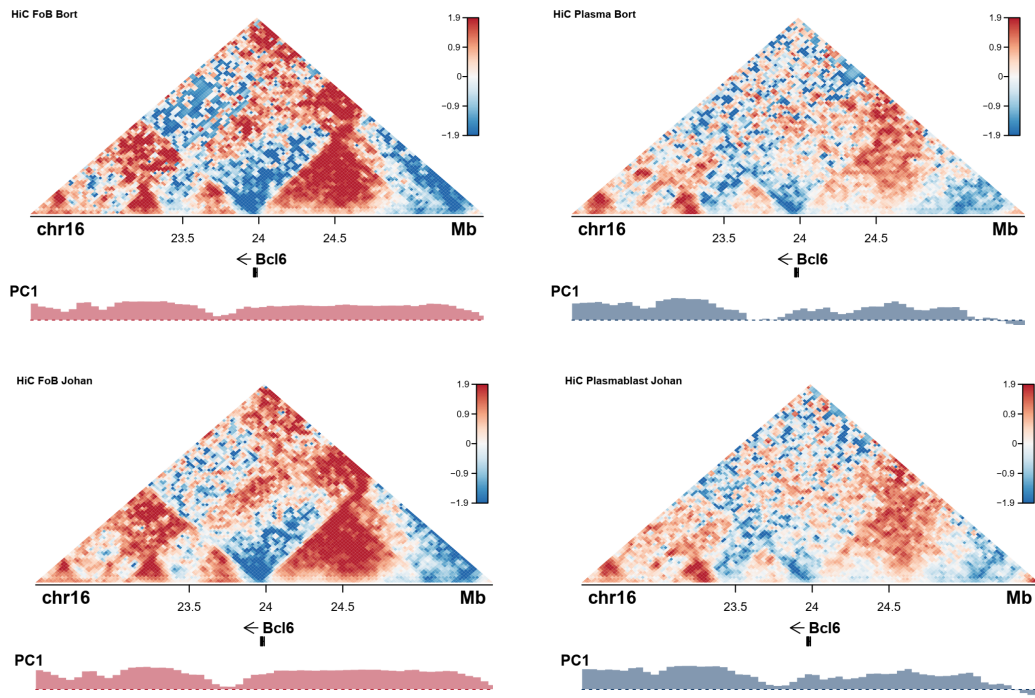

B

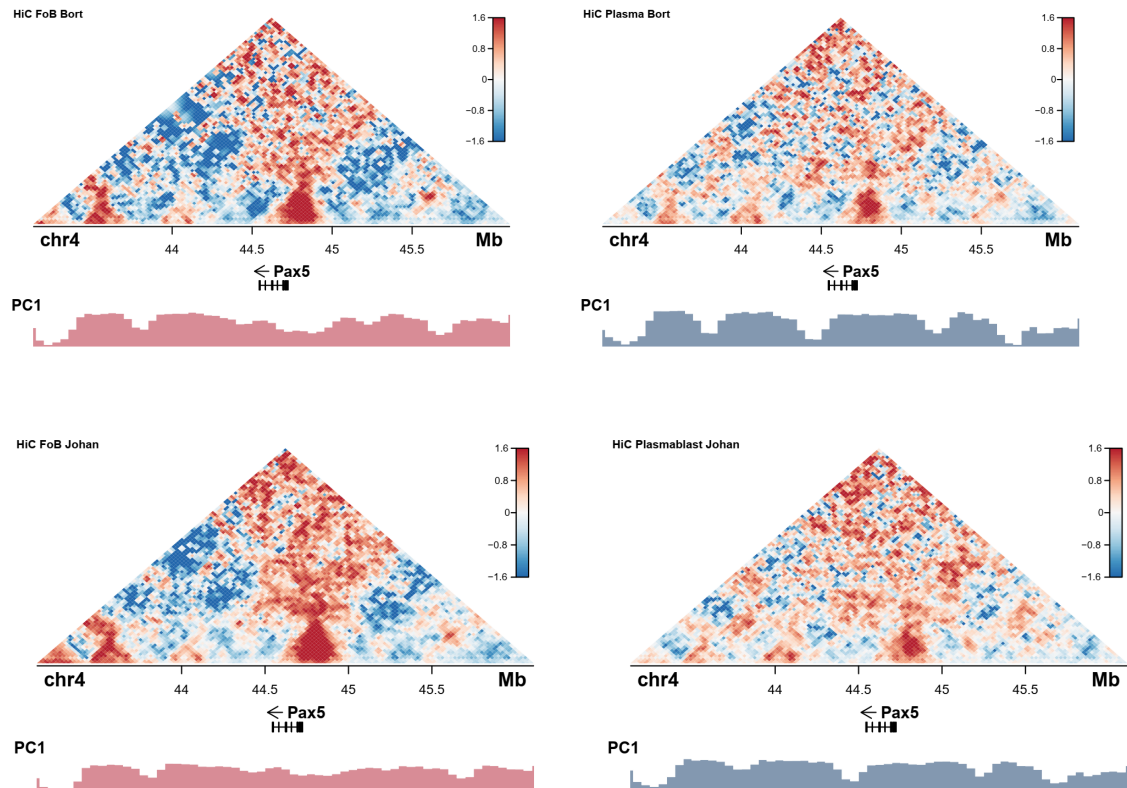

**Figure S4. Plasma Cell Fate is Associated with Large-Scale Changes in Chromatin Folding Across the *Bcl6* and *Pax5* Loci. Related to Figure 3. (A)** Contact map for chromosome 10 across the *Bcl6* locus at 50 kb resolution for follicular B and plasma cells derived from TCC data (top panels) or derived from HiC data (bottom panels) (Johanson et al., 2018). **(B)** Contact map for chromosome 11 across the *Pax5* locus at 50 kb resolution for plasma cells from TCC data (top panels) or derived from HiC data (bottom panels) (Johanson et al., 2018).

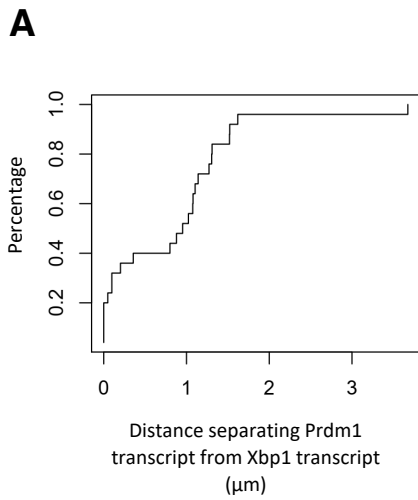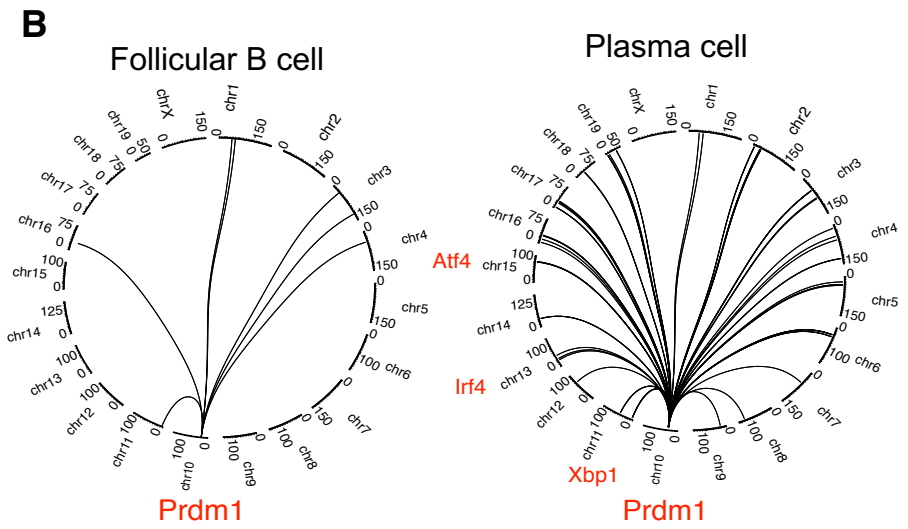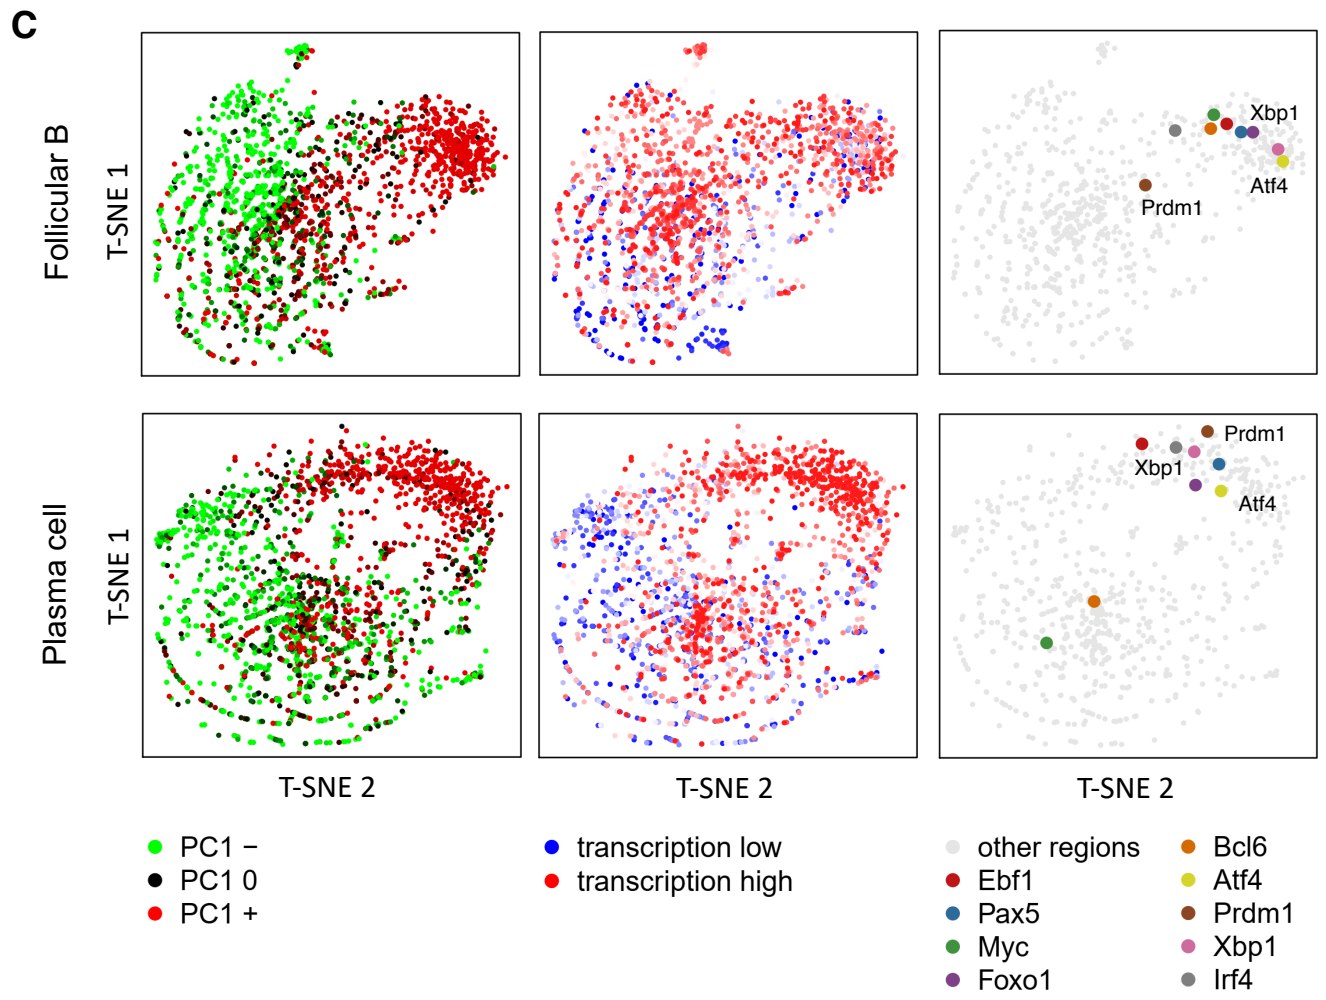

**Figure S5. Inter-Chromosomal Associations Involving the *Prdm1* Locus. Related to Figure 5.**

(A) Cumulative distribution of distance between *Prdm1* and *Xbp1* intronic RNA-FISH dots in 3d-activated plasma cells. (B) Circos plots for inter-chromosomal association centered on *Prdm1*. Genes contained within the 1 Mb interaction region and that appear in the inter-chromosomal cloud plot are indicated in red. (C) Inter-chromosomal association cloud plots showing the relative inter-chromosomal association preference of all genome regions (computed based on inter-chromosomal TCC reads). Each dot represents a 1 Mb region of the genome. The closer two dots in 2D distance, the more likely they share significant inter-chromosomal association. Dots are colored by PC1 value (left), transcriptional activity (middle) and genes of interest (right).
